# Supplementary material for: The Glp-1 Analog Liraglutide Protects Against Angiotensin II and Pressure Overload-Induced Cardiac Hypertrophy via PI3K/Akt1 and AMPKa Signaling
Source: PubMed Central journal article supplement (PMC6560159; doi:10.3389/fphar.2019.00537), 2019-06-05
Supplement: Image_1.pdf [file Image_1.pdf]

Figure S1

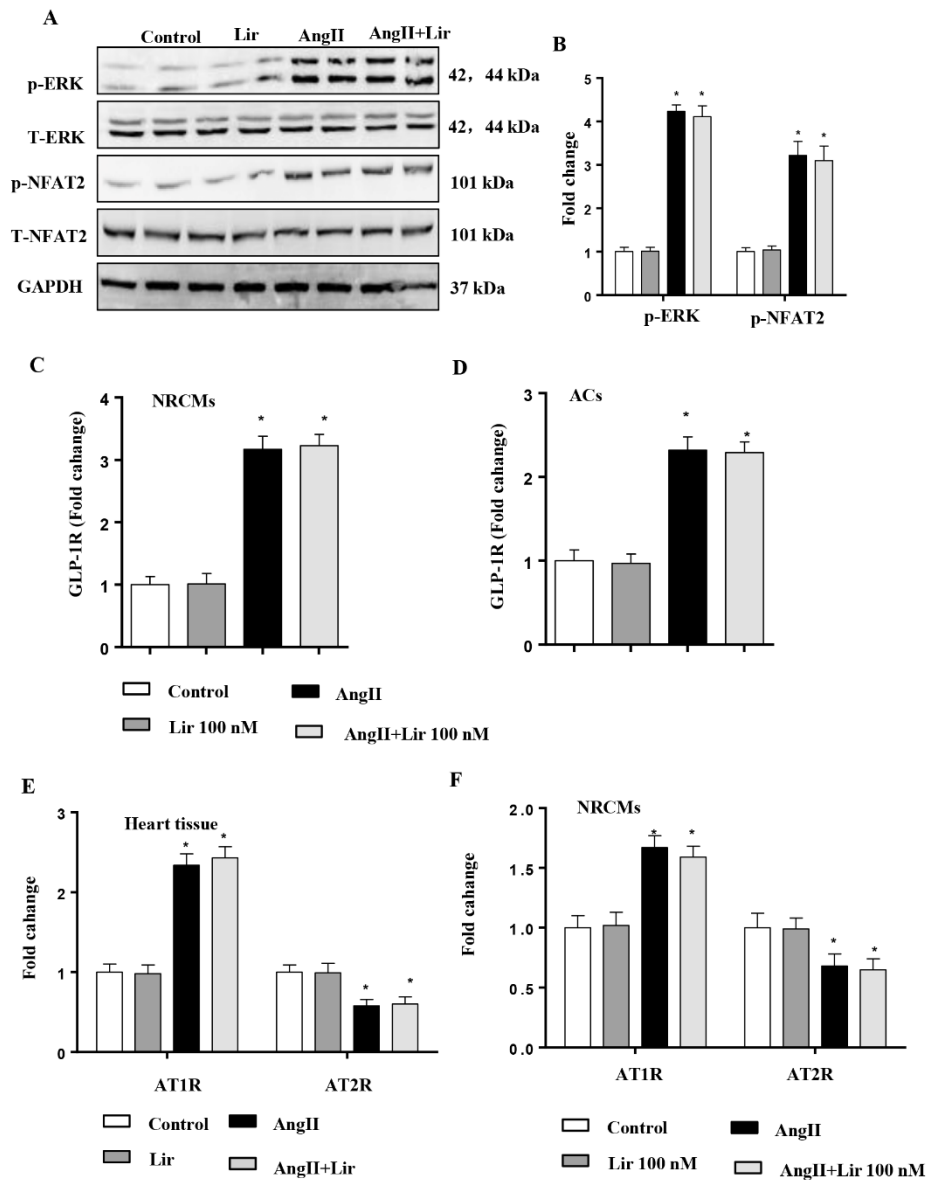

**Figure S1. The effect of Lir on ERK and NFAT2 signalling**

The protein expression of phosphorylated and total ERK and NFAT2 in mice from the four groups. Representative WB (A) and quantitative results (B) (n=6). \*P<0.05, compared to control group. C and D: The expression level of GLP-1R level in NRCMs and ACs after stimulated with Ang II and treated with liraglutide (100nM). \*P<0.05, compared to control group. E: The mRNA expression level of AT1R and AT2R in heart tissue with AngII infusion. F: The mRNA expression level of AT1R and AT2R in

NRCMs after AngII stimulation. \*P<0.05, compared to control group.
